# Supplementary material
Source: PubMed Central journal article supplement (PMC2758764)
Supplement: M900194-MCP200v2_1.pdf [file M900194-MCP200v2_1.pdf]

Supplementary data to the paper "Lack of A-factor production induces the expression of nutrient scavenging and stress-related proteins in *Streptomyces griseus*". PSD and CID-spectra confirming the protein identifications.

Peptide fragments are labeled according to [Biemann, K. (1990). Nomenclature for peptide fragment ions (positive-ions) *Meth. Enzymol.* **193**, 886-887. ]; NH<sub>3</sub> loss from certain fragments is indicated by asterisks.

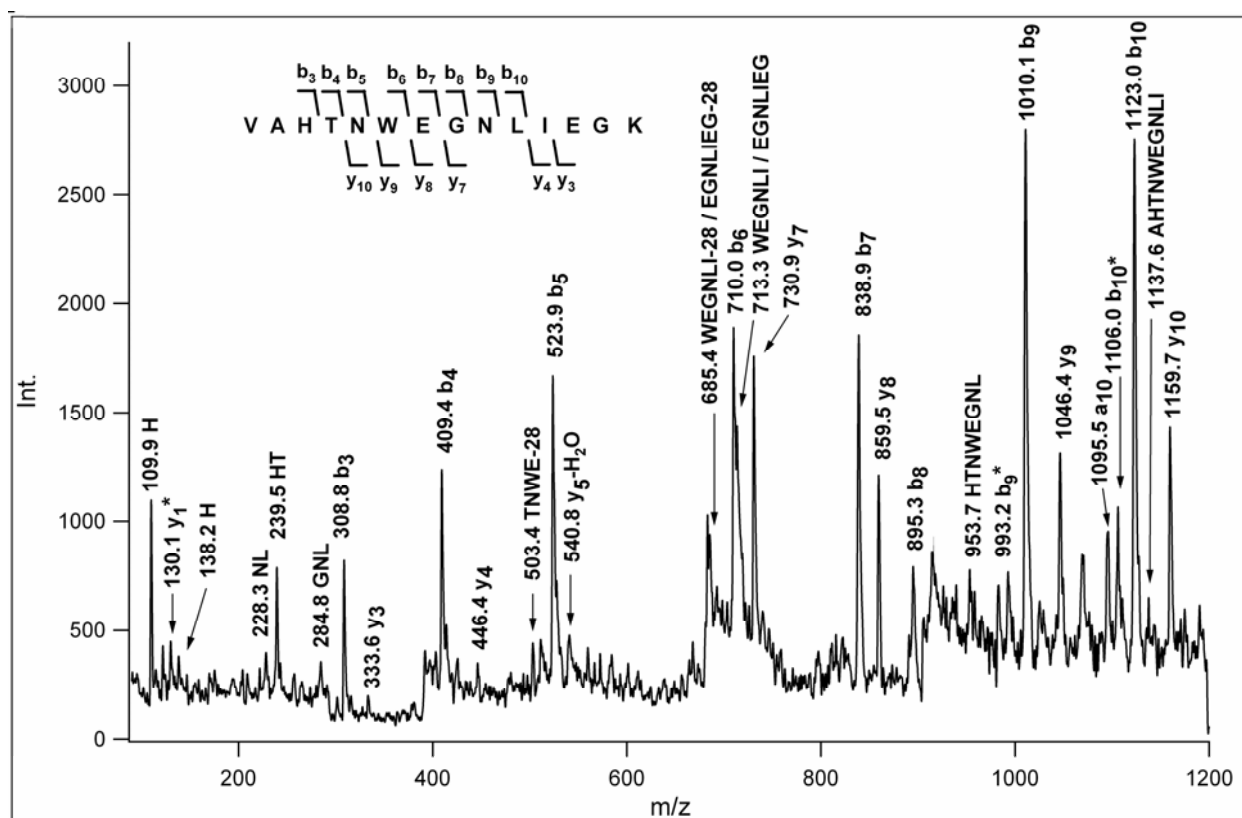

S1a

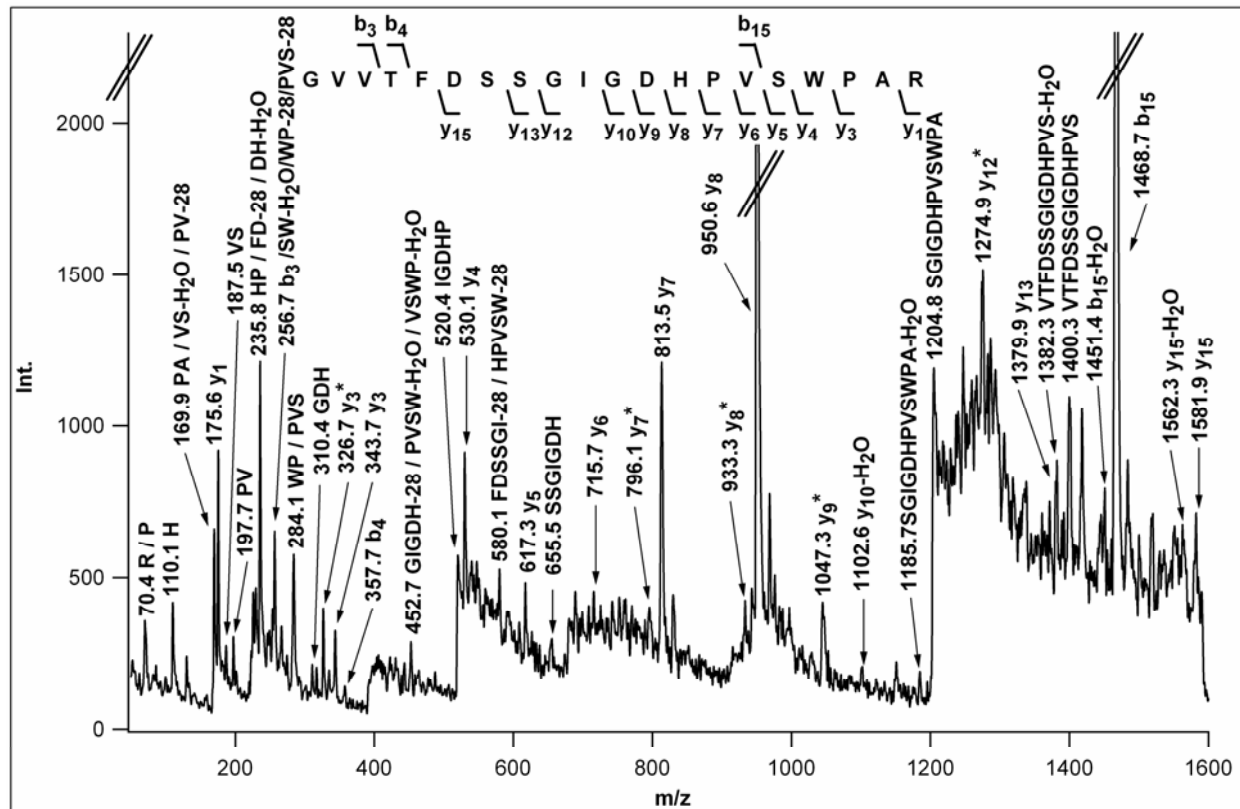

S1b

**Figure S1** PSD-spectra of  $MH^+ = 1567.79$  (S1a) and  $MH^+ = 2084.02$  (S1b) peptides corresponding to VAHTNWEGNLIIEGK [6-19] and GVVTFDSSGIGDHPVSWPAR [20-39] of putative ATP/GTP-binding protein (# 1).

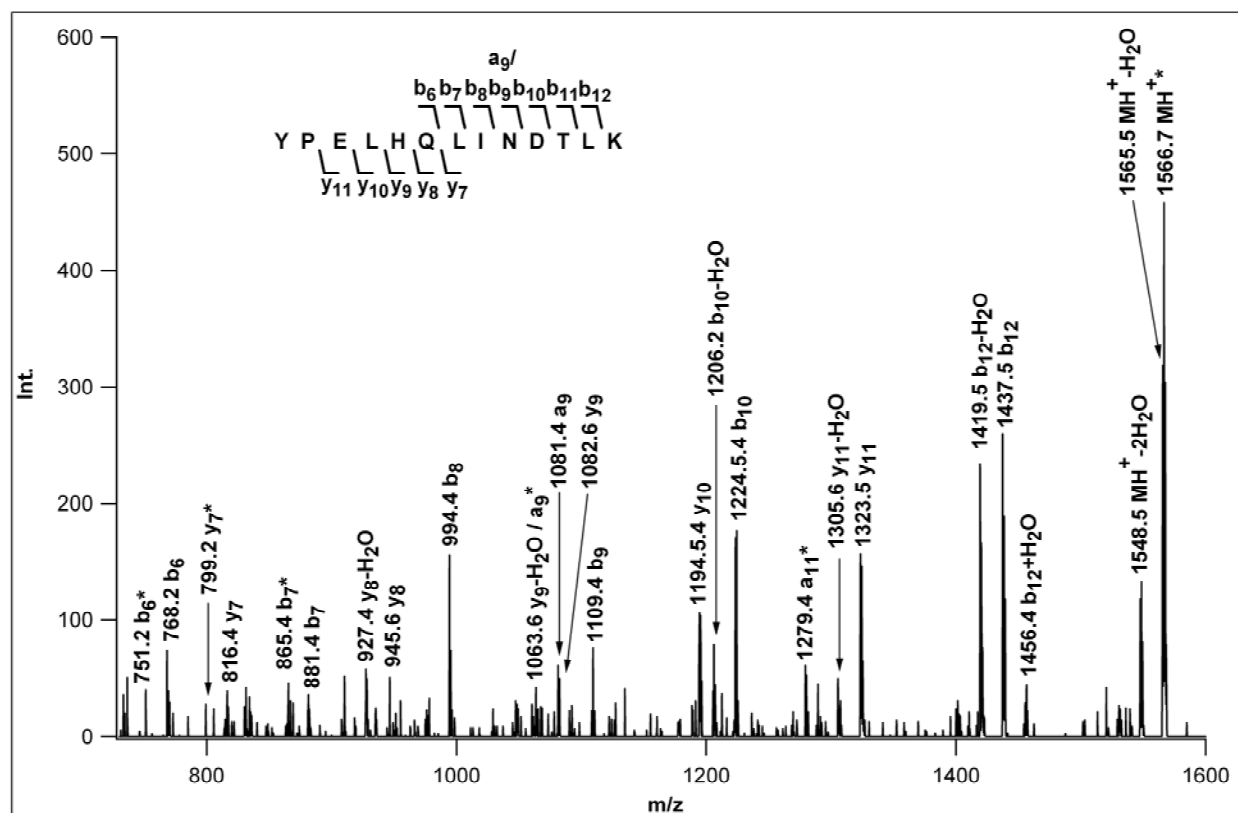

**Figure S2** PSD-spectrum of MH<sup>+</sup> = 1583.84 peptide corresponding to the YPELHQLINDTLK [85-97] of putative superoxide dismutase (# 2).

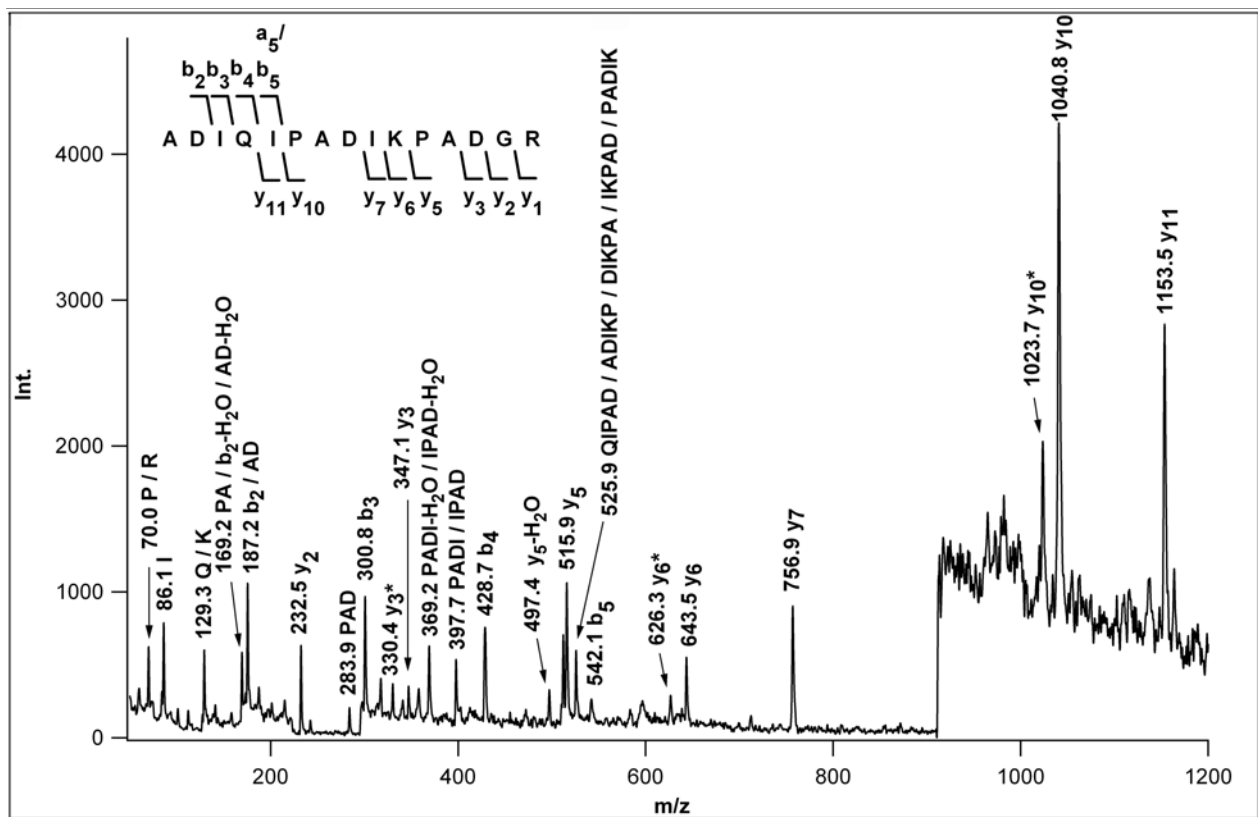

S3a

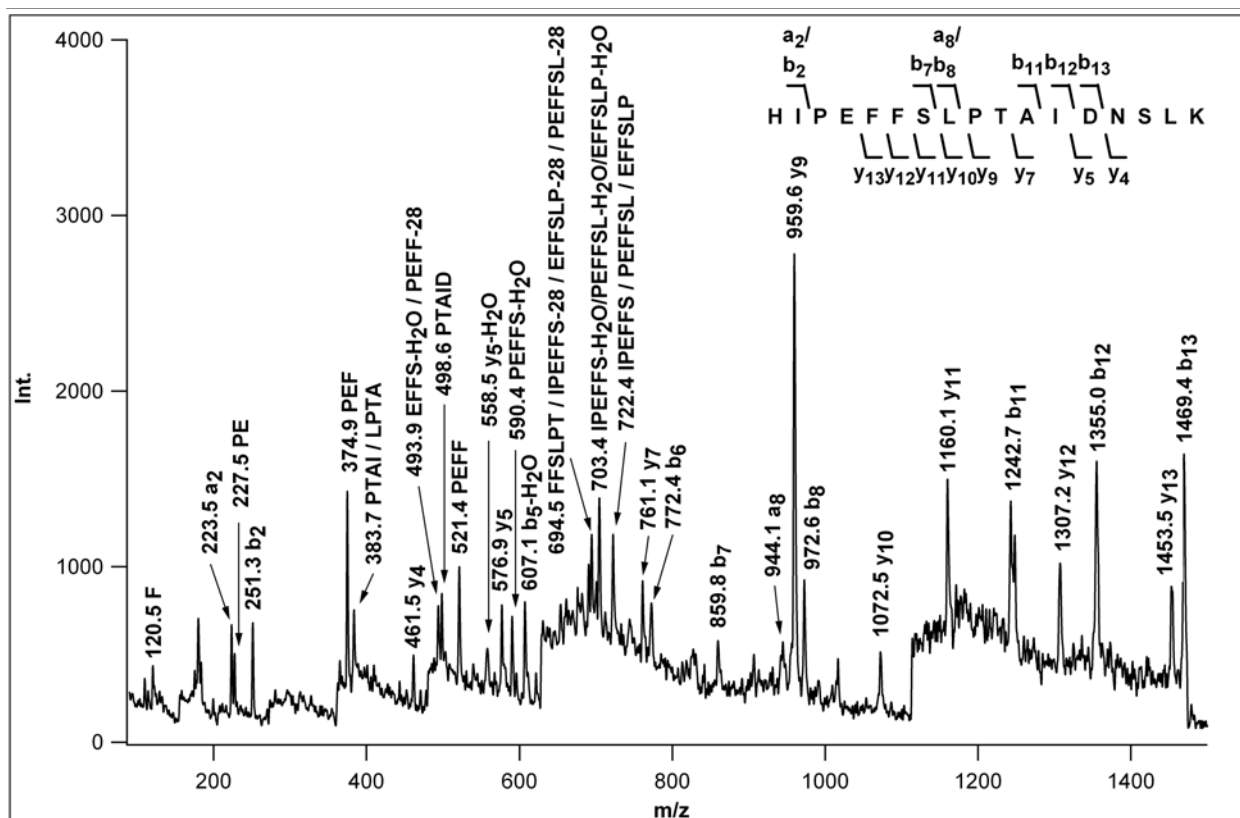

S3b

**Figure S3** PSD-spectra of  $MH^+ = 1579.84$  (S3a) and  $MH^+ = 1929.01$  (S3b) peptides corresponding to ADIQIPADIKPADGR [2-16] and HIPEFFSLPTAIDNSLK [226-242] of putative aminotransferase (# 3 and 4).

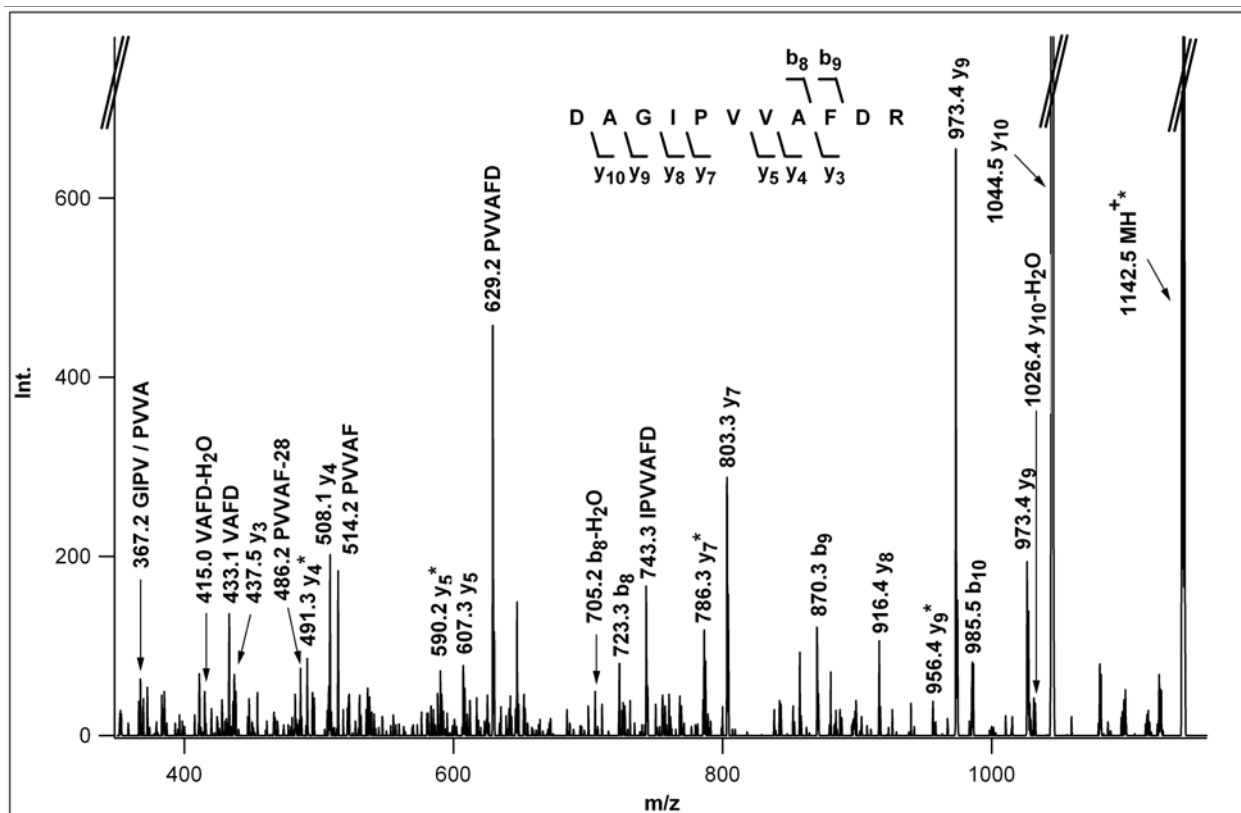

S4a

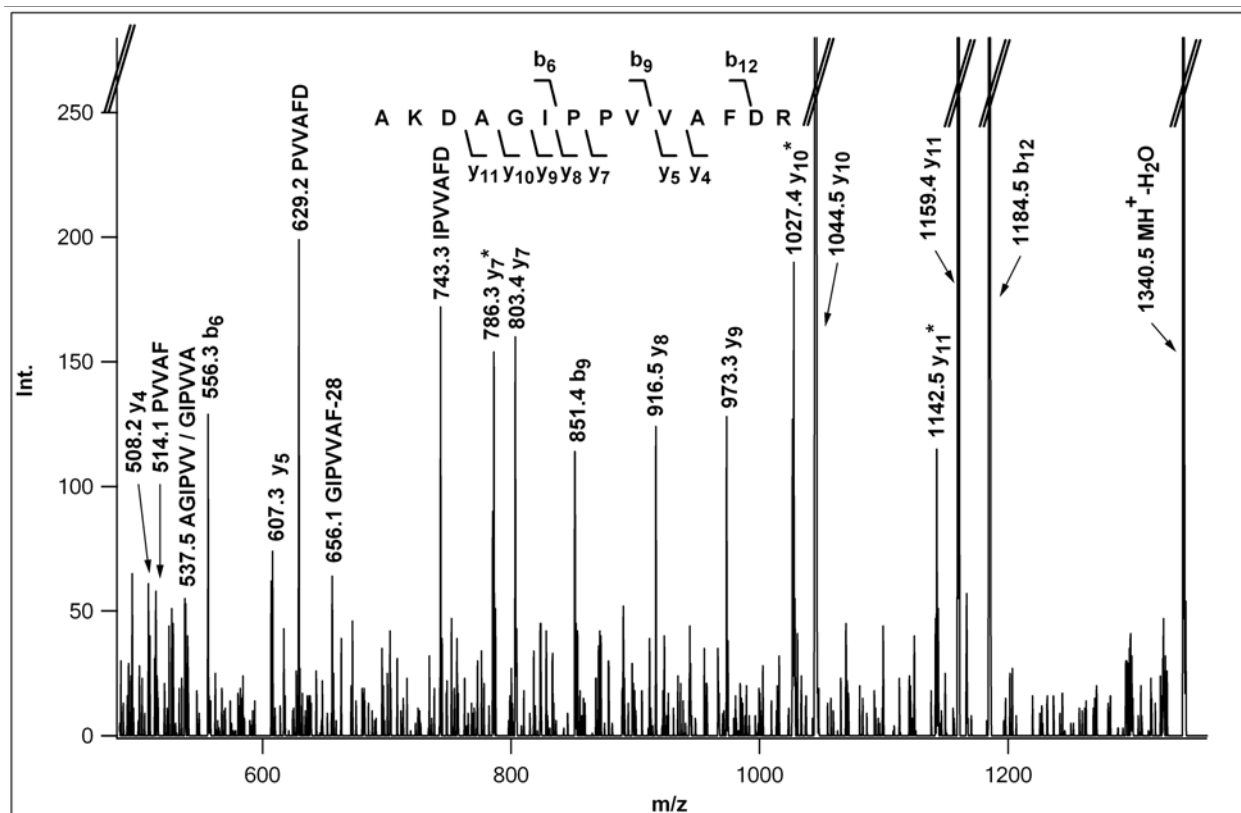

S4b

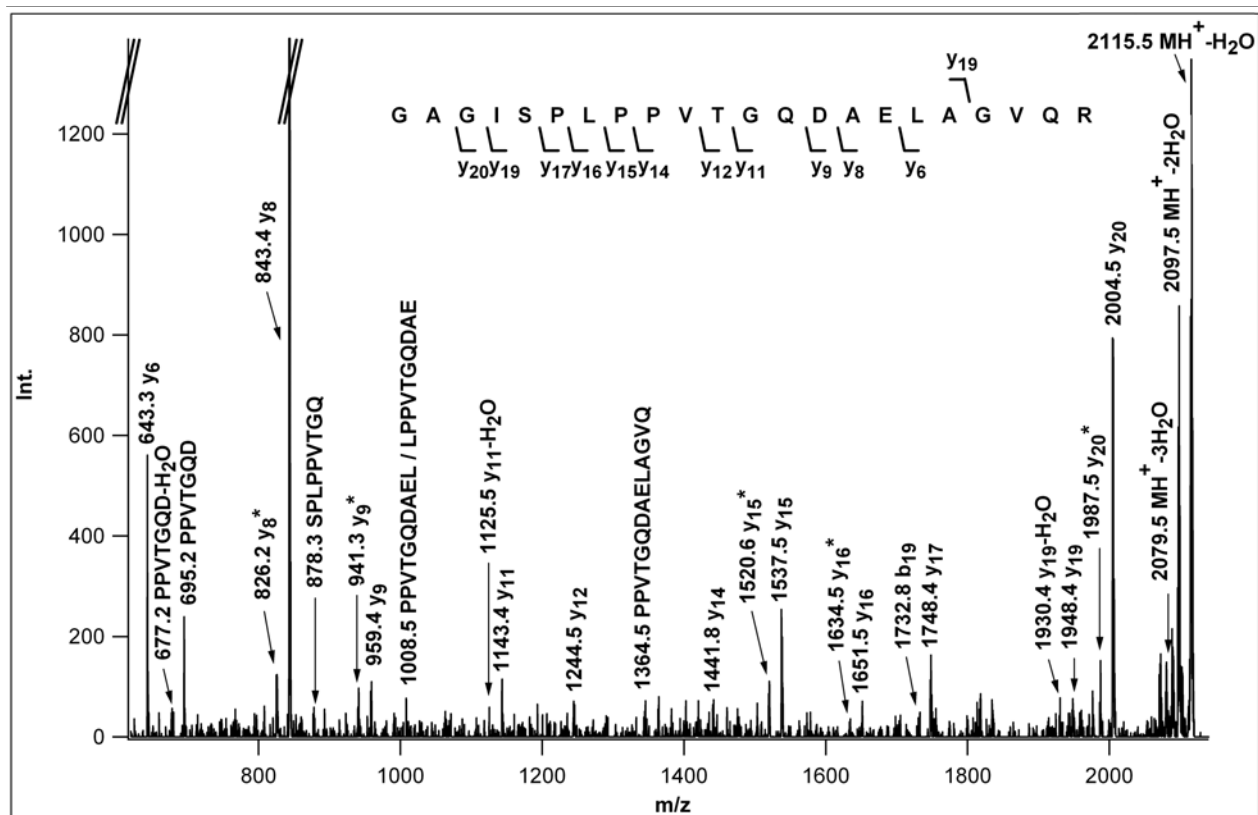

S4c

**Figure S4** PSD-spectra of MH<sup>+</sup> = 1159.61 (S4a), MH<sup>+</sup> = 1358.74 (S4b) MH<sup>+</sup> = 2133.13 (S4c) peptides corresponding to DAGIPVVAFDR [127-137], AKDAGIPVVAFDR [125-137] and GAGISPLPPVTGQDAELAGVQR [254-275] of putative ABC transporter solute-binding protein (# 5-8).



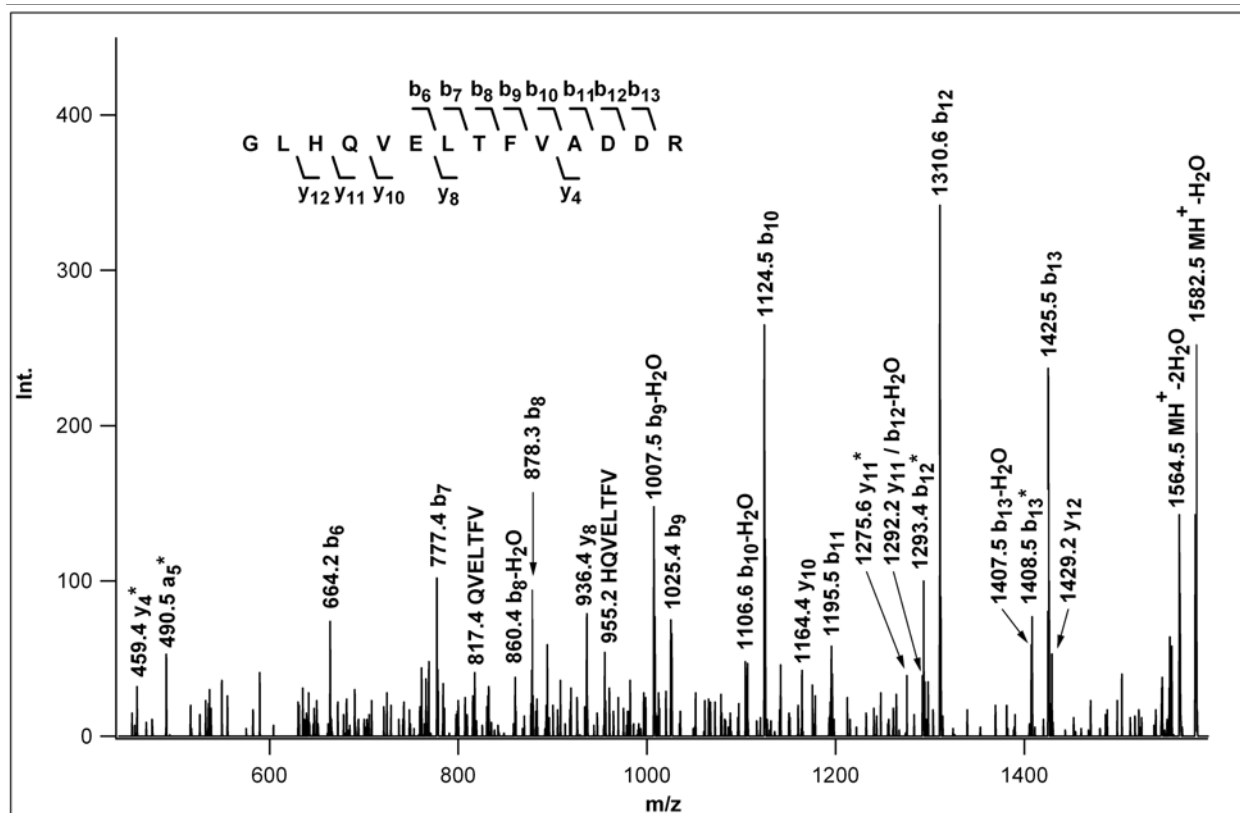

S5a

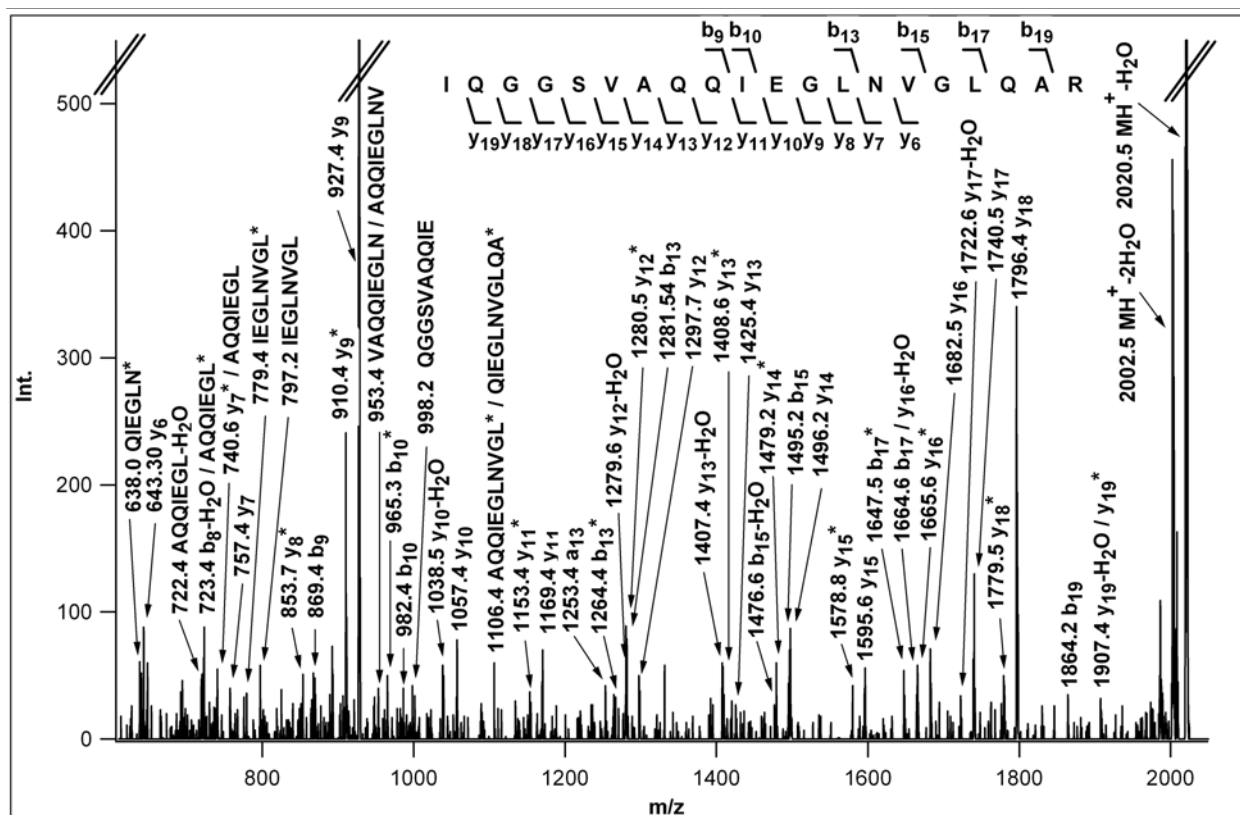

S5b

**Figure S5** CID-spectra of  $MH^+ = 1599.81$  (S5a) and  $MH^+ = 2038.10$  (S5b) peptides corresponding to GLHQVELTFVADDR [192-205] and IQGGSVAQIEGLNVGLQAR [38-57] of hypothet. pro. sporulation-control protein (# 9).

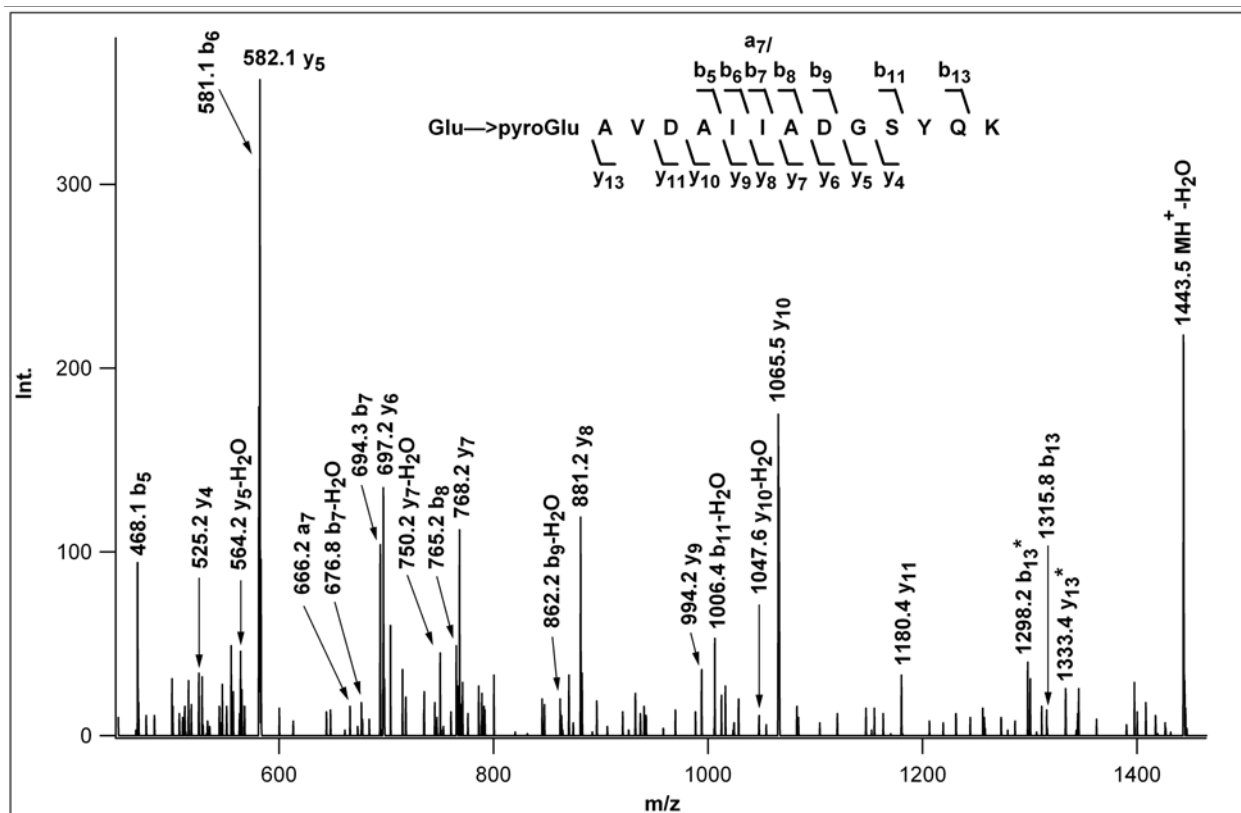

S6a

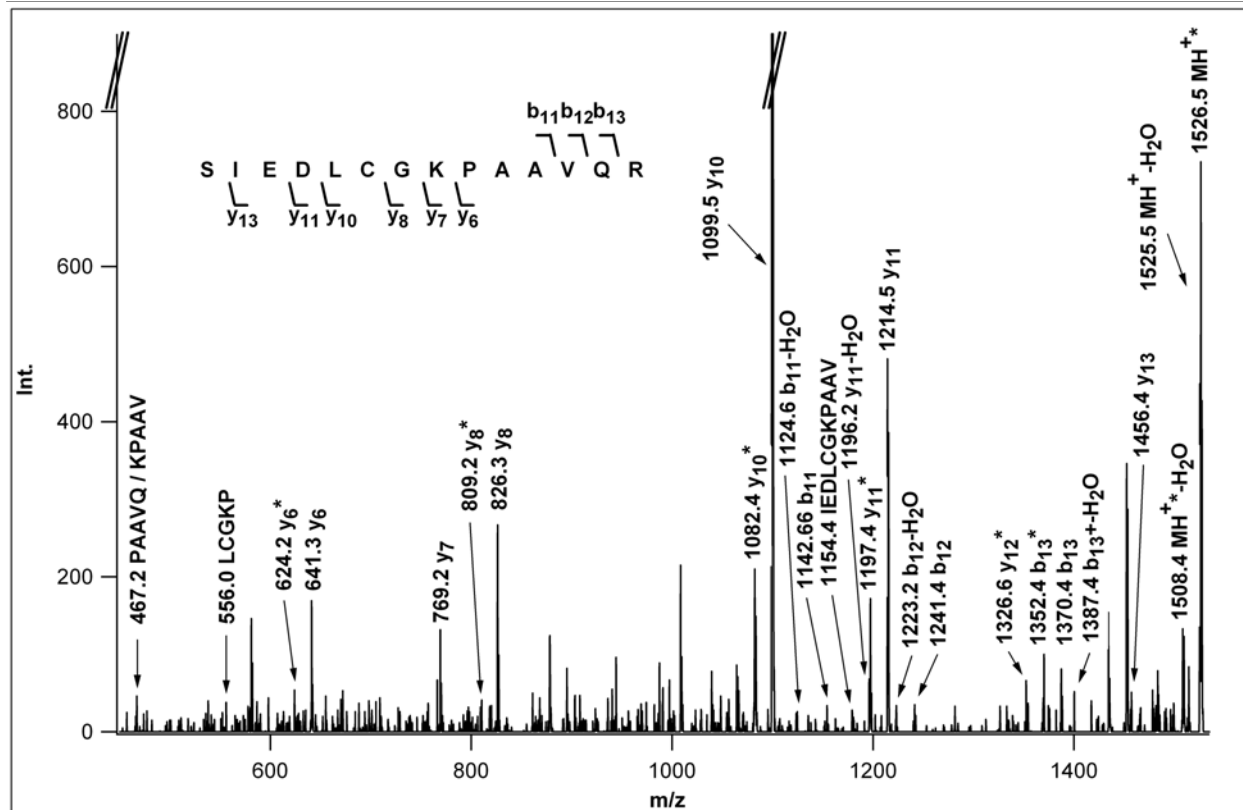

S6b

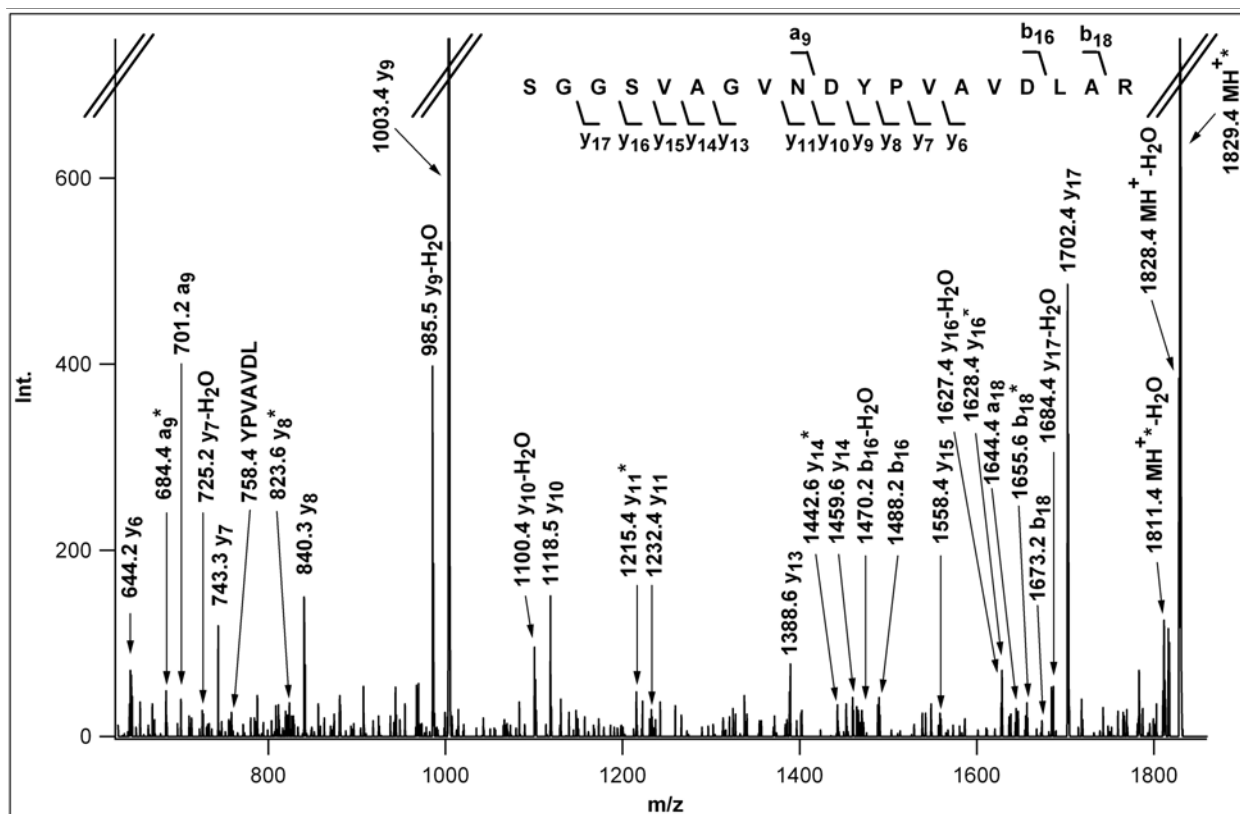

S6c

**Figure S6** PSD-spectra of  $MH^+ = 1461.72$  (S6a),  $MH^+ = 1543.79$  (S6b)  $MH^+ = 1846.93$  (S6c) peptides corresponding to the Glu→pyroGluAVDAIIADGSYQK [286-299], SIEDLCGKPAAVQR [178-191] and SGGSVAGVNDY PVAVDLAR [231-249] of putative arginine/ornithine binding protein (# 10).

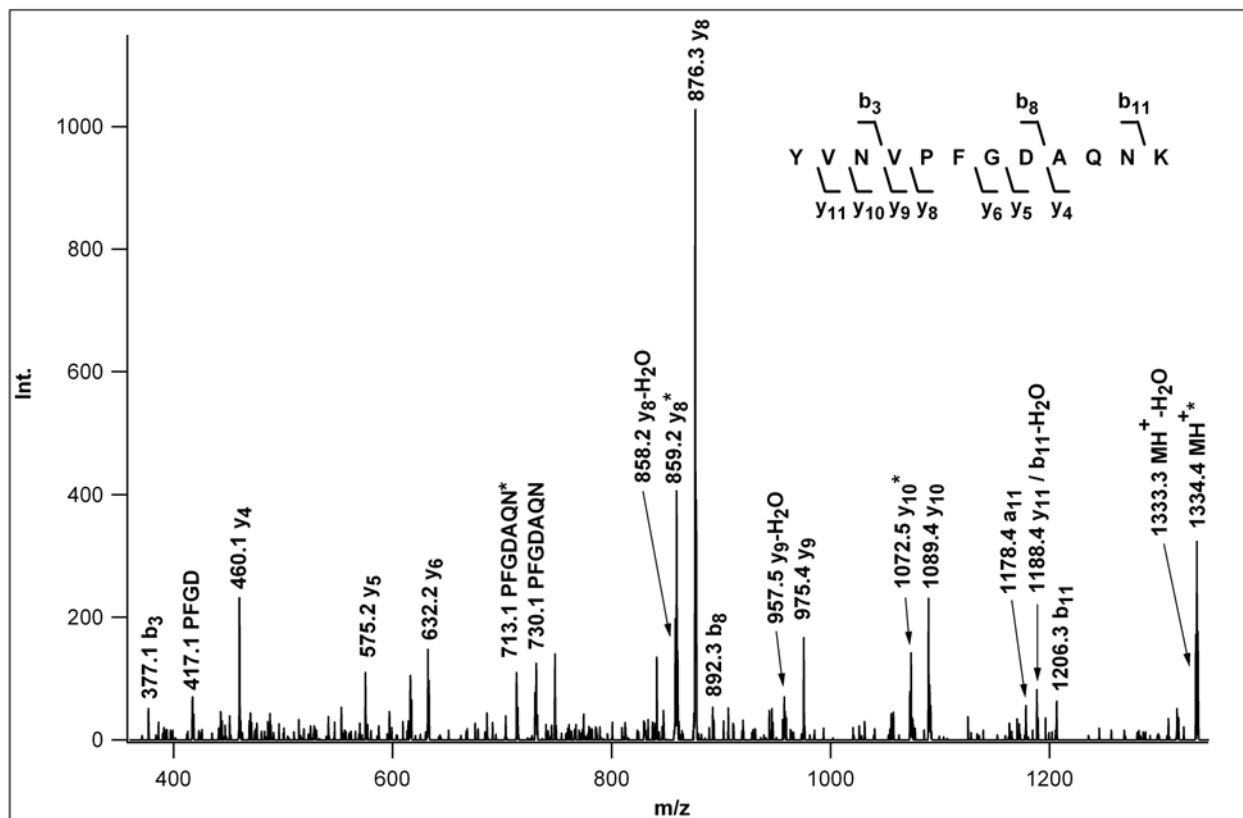

S7a

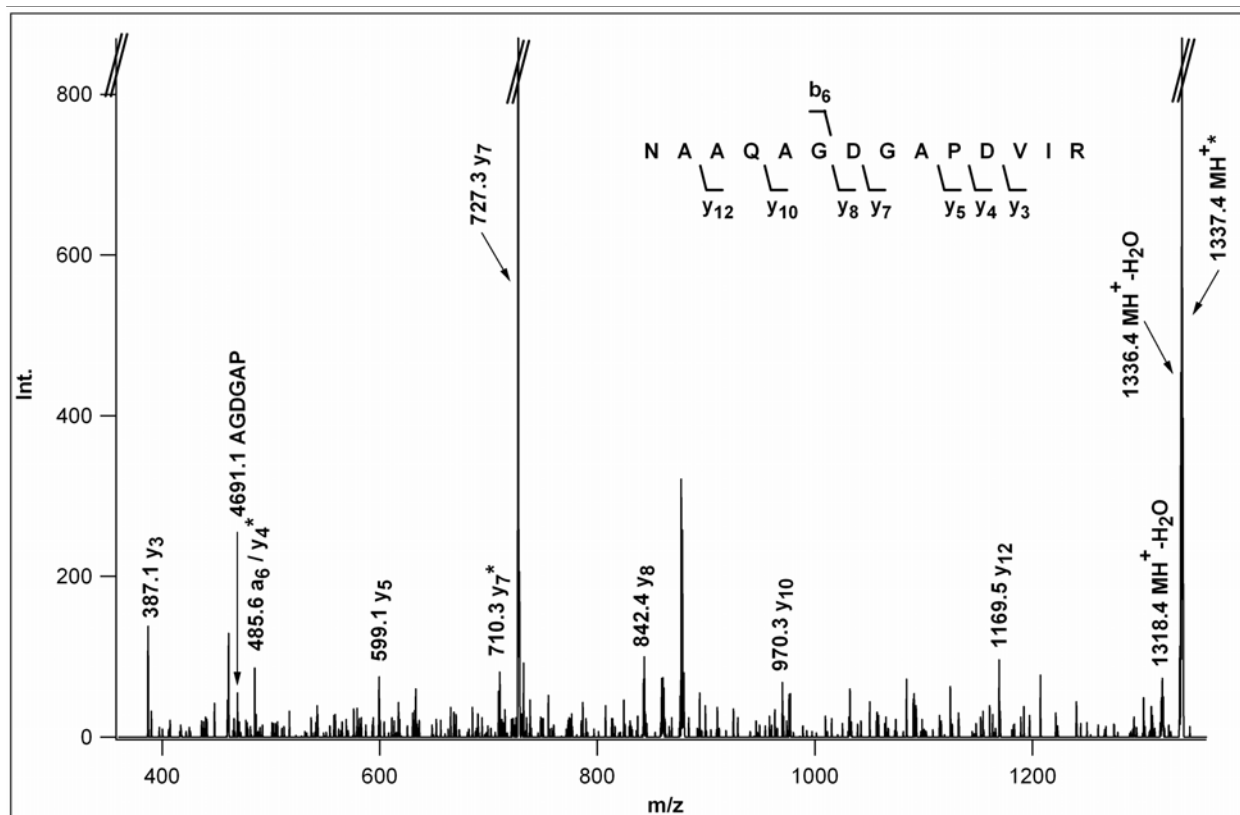

S7b

**Figure S7** CID-spectra of  $MH^+ = 1351.66$  (S7a) and  $MH^+ = 1354.67$  (S7b) peptides corresponding to YVNVPGDAQNK [73-84] and NAAQAGDGAPDVIR [87-100] of putative ABC transporter maltose-binding protein (# 11).

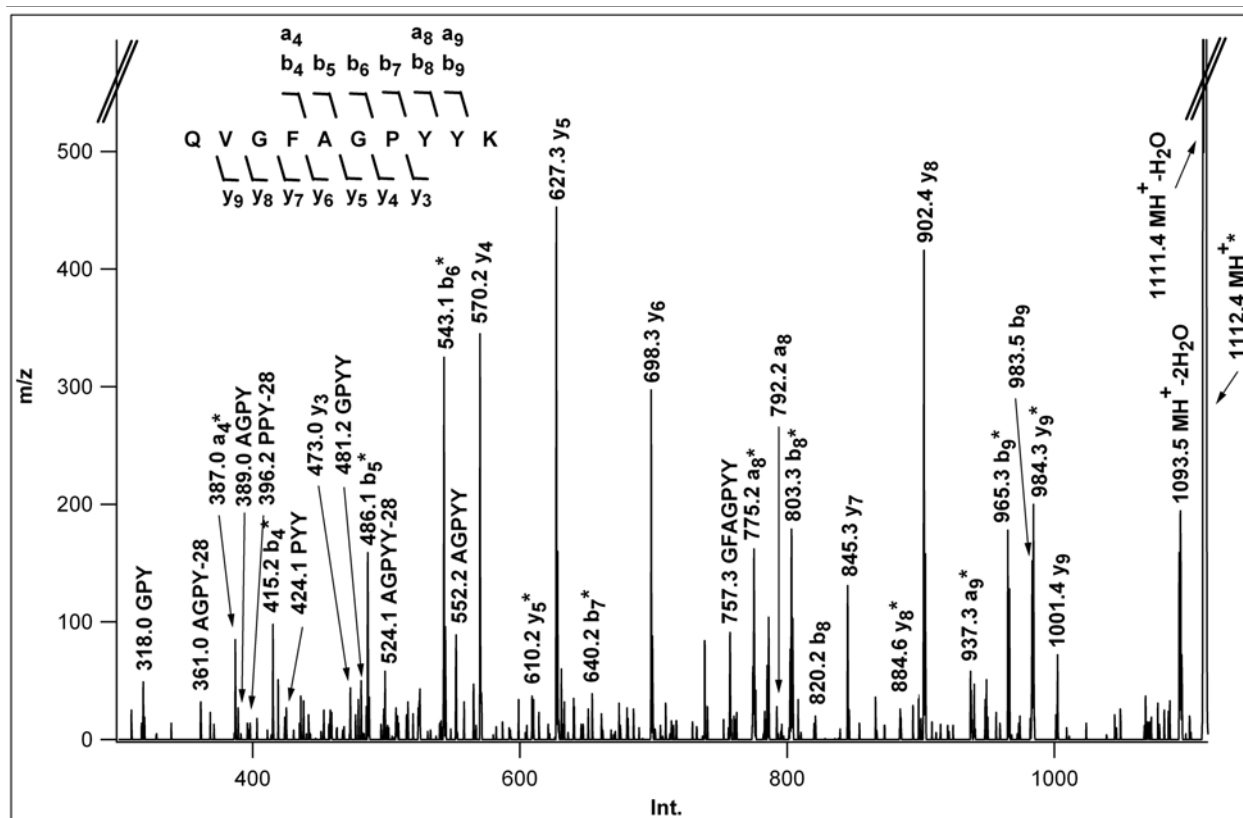

S8a



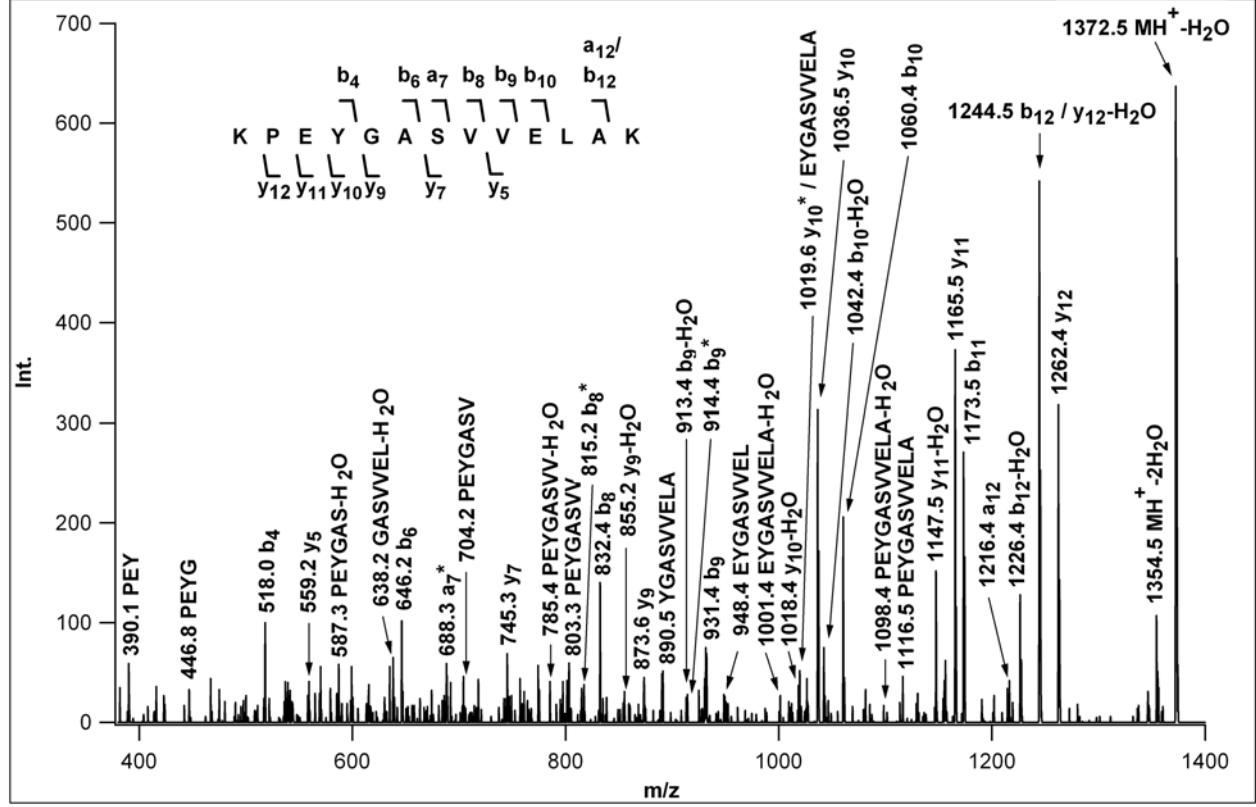

S8b

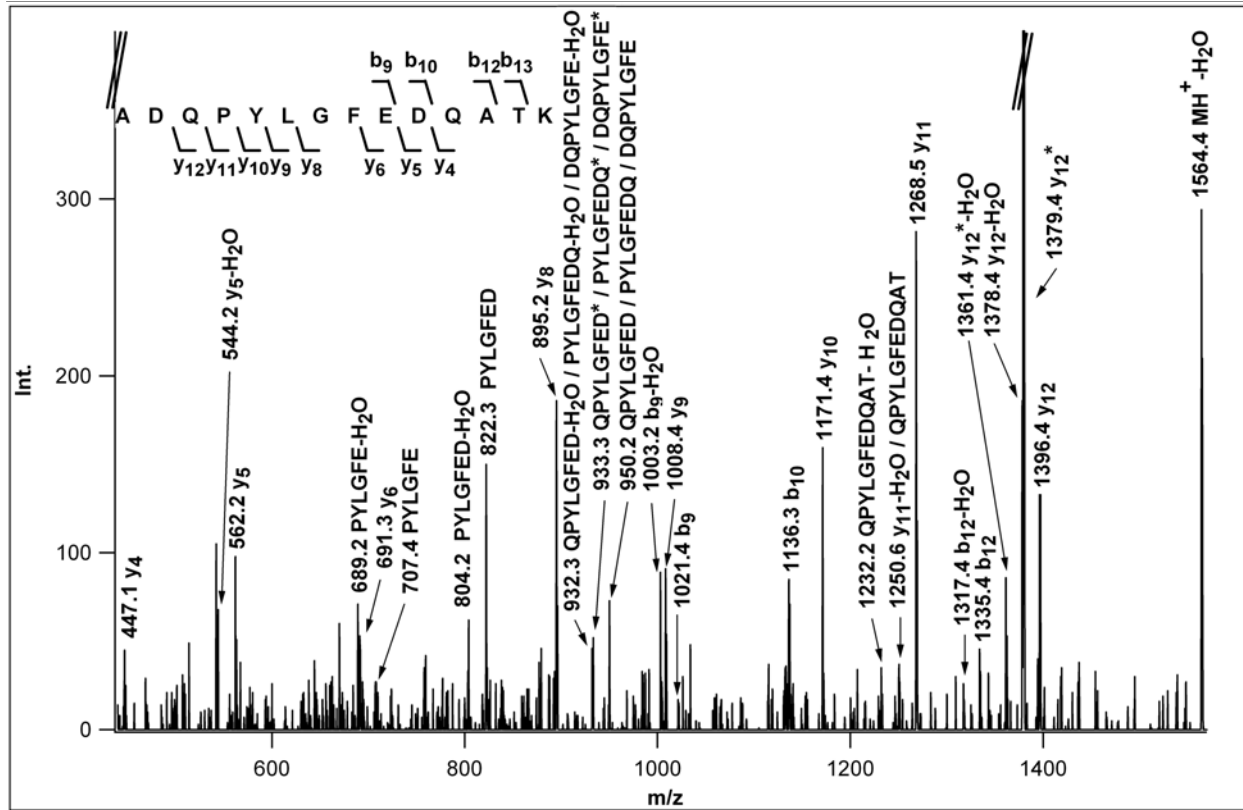

S8c

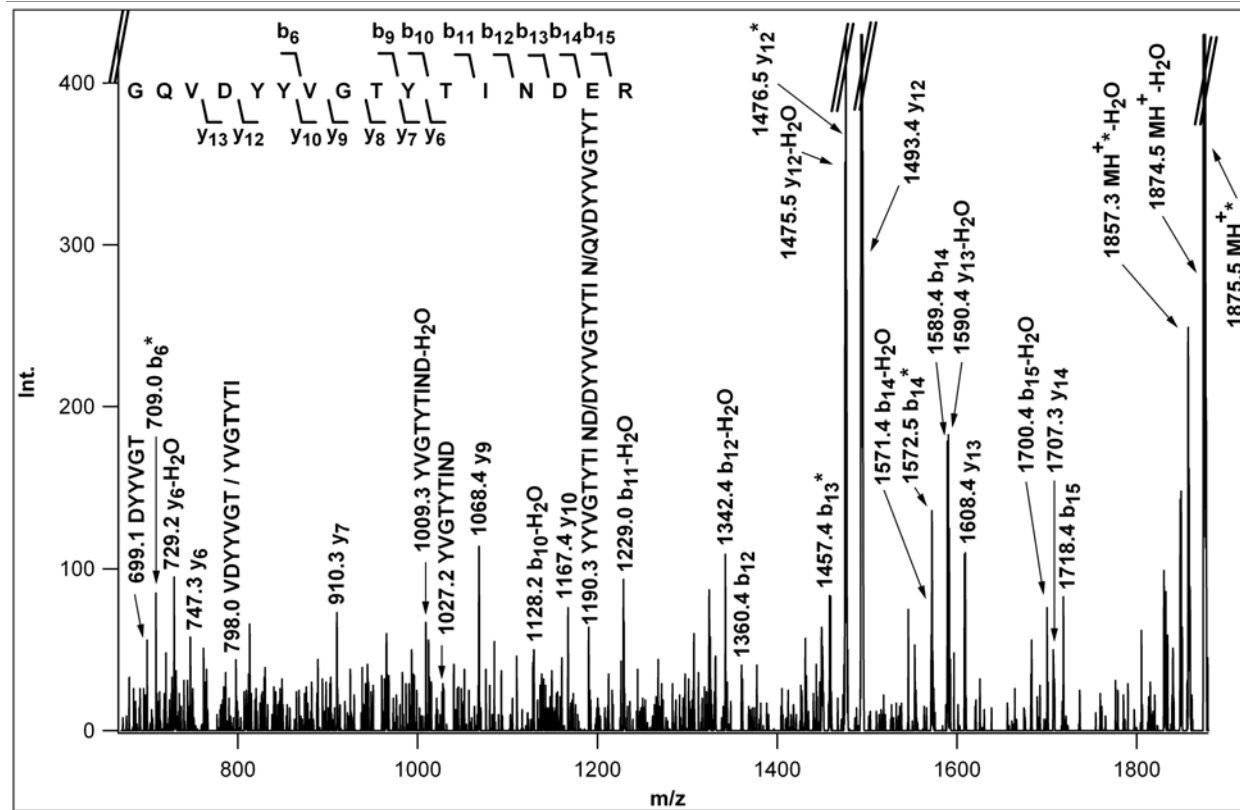

S8d

**Figure S8** PSD-spectra of  $MH^+ = 1129.57$  (S8a),  $MH^+ = 1390.76$  (S8b),  $MH^+ = 1582.74$  (S8c) and  $MH^+ = 1892.87$  (S8d) peptides corresponding to QVGFAGPYK [149-158], KPEYGASVELAK [197-209], ADQPYLGFEDQATK [77-90] and GQVDYYVVGTYTINDER [131-146] of putative glutamate ABC transporter substrate-binding protein (# 12 and 13).

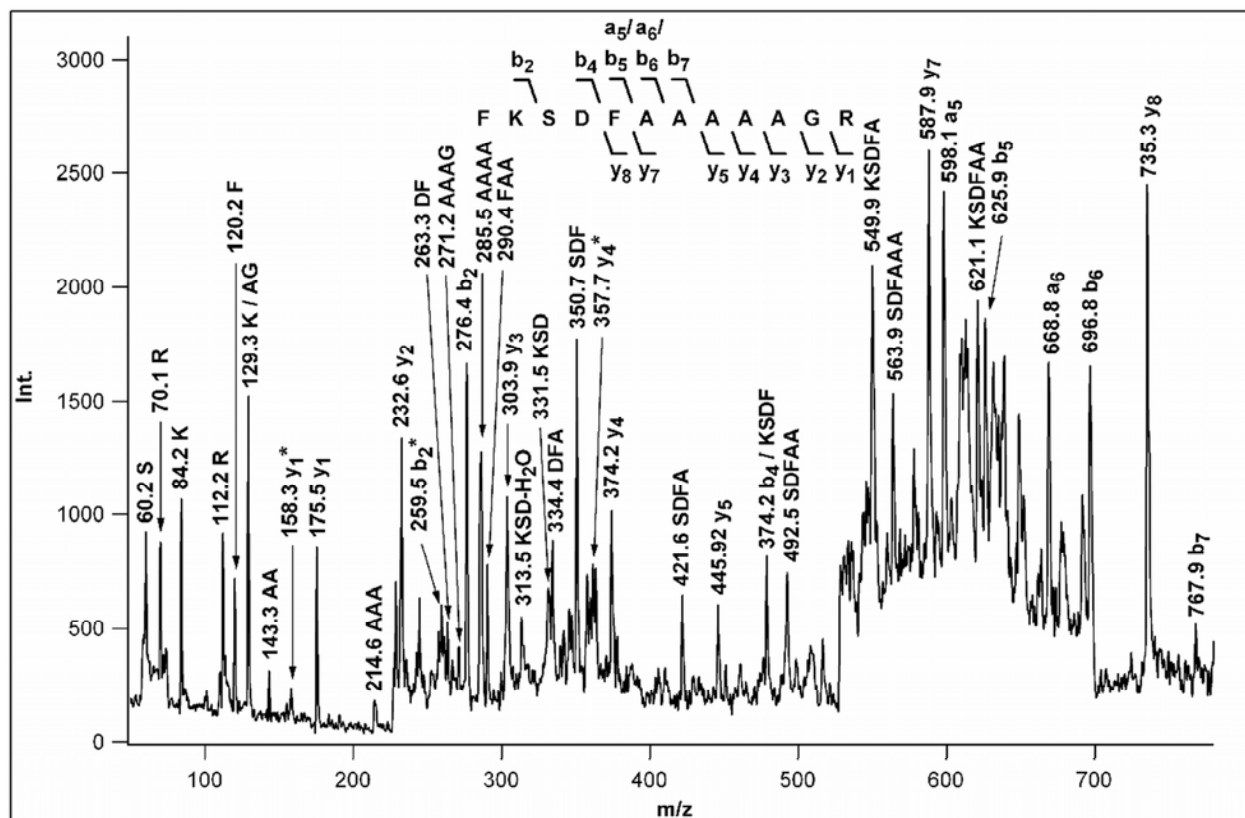

S9

**Figure S9** PSD spectrum of  $MH^+ = 1211.61$  peptide, corresponding to the FKSDFAAAAAGR [115-126] sequence of manganese (Mn) superoxide dismutase SodA (# 14).

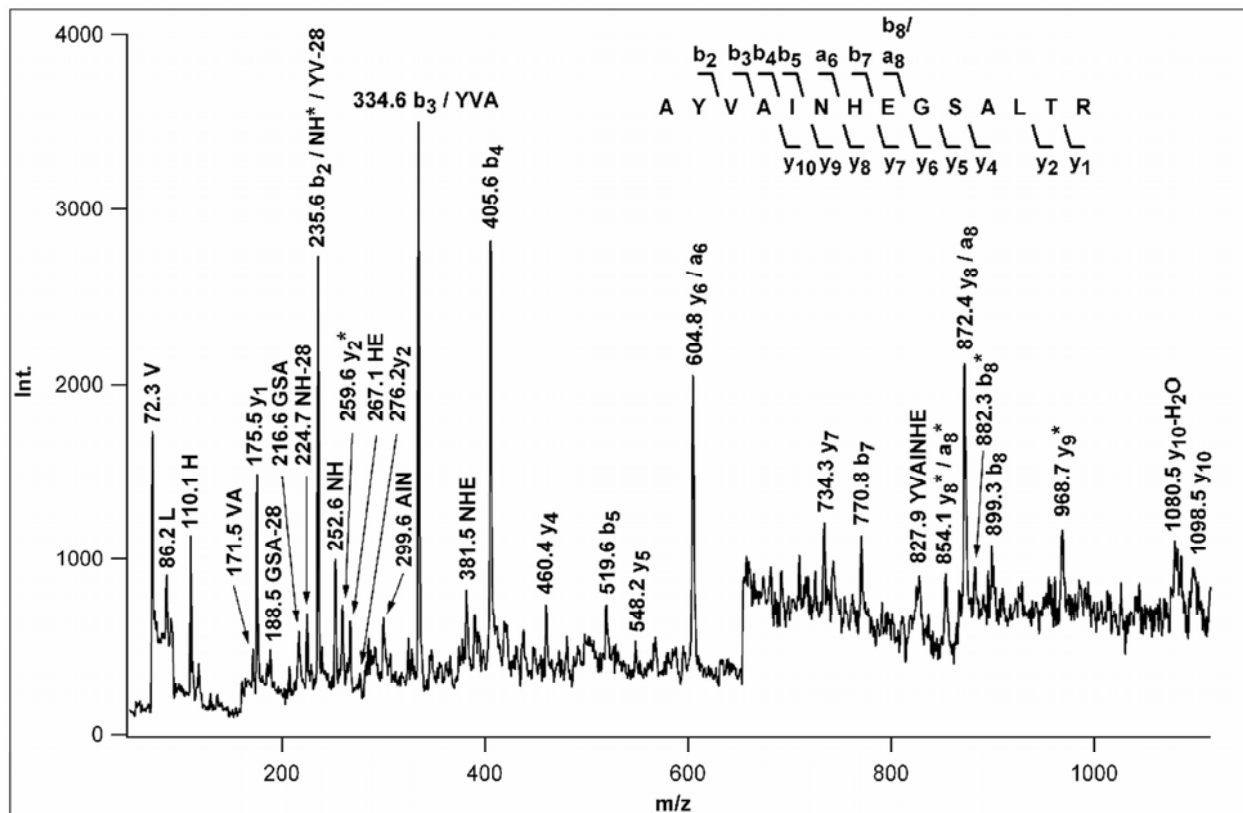

S10a

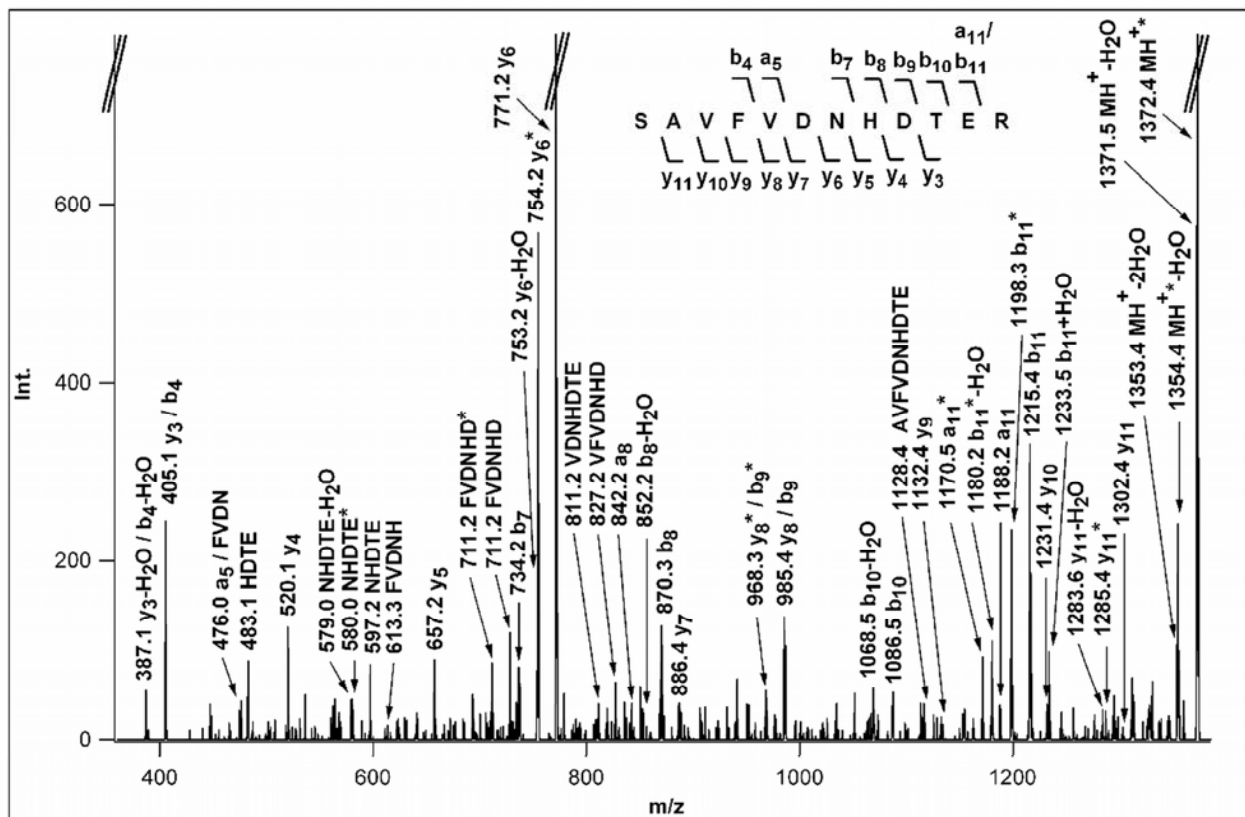

S10b

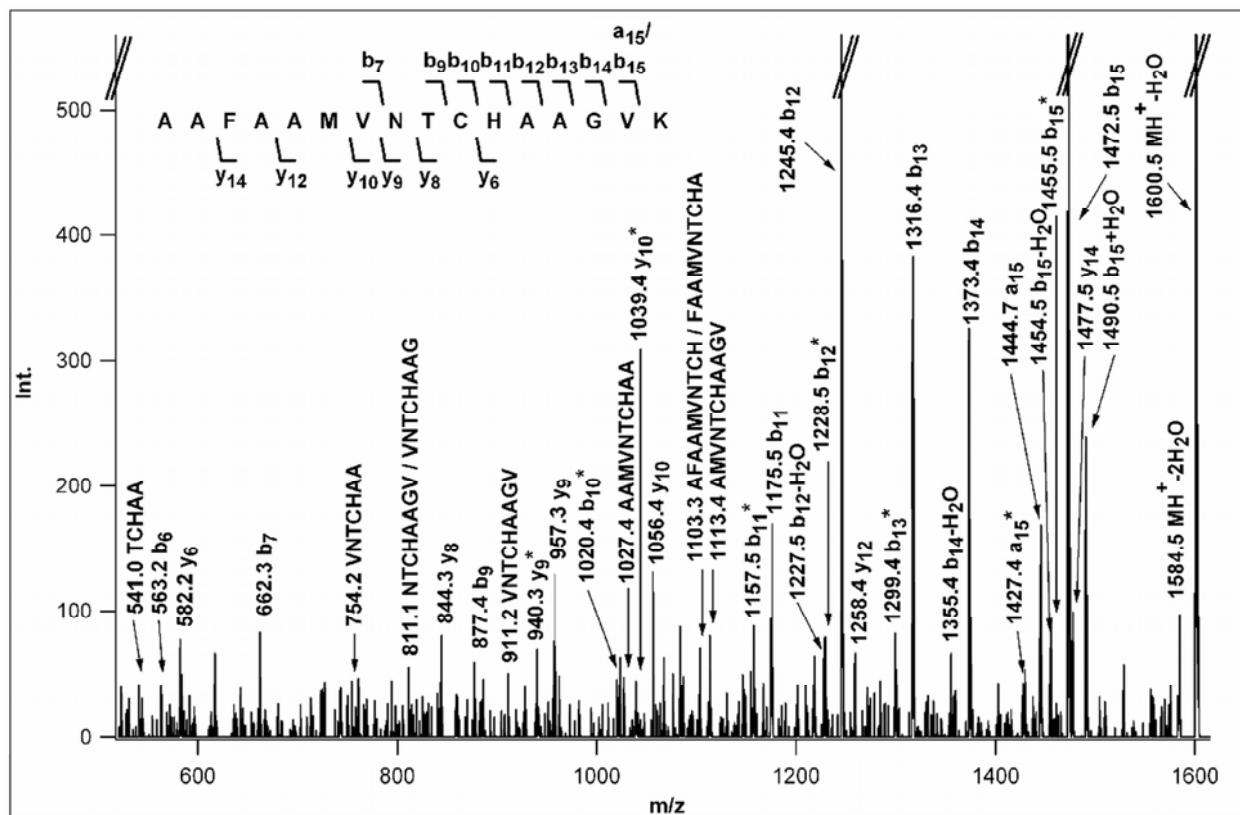

S10c

**Figure S10** PSD spectrum of  $MH^+ = 1501.78$  (S10a) and CID spectra of  $MH^+ = 1389.64$  (S10b) and  $MH^+ = 2133.13$  (S10c) peptides, corresponding to the AYVAINHEGSALTR [406-419], SAVFVDNHDTER [295-306] and AAFVNTCHAAAGVK [103-118] sequences of putative putative alpha-amylase (# 15 and 16).

**Table S1**

Oligonucleotides used for semi-quantitative RT PCR analysis. Oligonucleotides ending with 'f' were used as forward primers in the amplification step, those ending with 'r' for cDNA synthesis with reversed transcriptase and as reverse primers during amplification. #, position is indicated relative to the start of the target gene; c, complementary to coding strand.

| Oligonucleotide | Target  | Position 5' end # | Sequence (5' → 3')    |
|-----------------|---------|-------------------|-----------------------|
| RT_1460+169f    | SGR1460 | +169              | CACTCCAGCTGCTTCTCGAT  |
| RT_1460+419r    | SGR1460 | +419c             | AGCGAGGCCGTCAGGGTGATC |
| RT_1498+105f    | SGR1498 | +105              | AGGAGGTTTCGGAGAAGAAGG |
| RT_1498+313r    | SGR1498 | +313c             | CCTTGTTGGTGATCATGGTG  |
| RT_1737+286f    | SGR1737 | +286              | GACATCGAGATCGCCAAGAT  |
| RT_1737+558r    | SGR1737 | +558c             | GATCGAGCAGACCTTCTTGC  |
| RT_2237+514f    | SGR2237 | +514              | AACCCGCAGAACATCAAGTC  |
| RT_2237+729r    | SGR2237 | +729c             | GACCGGGTAGTCGTTGACAC  |
| RT_2245+118f    | SGR2245 | +118              | GAGAAGTACCAGGCCAACGA  |
| RT_2245+396r    | SGR2245 | +396c             | TCAGGCCTTCTTGGTCTCC   |
| RT_3109+429f    | SRG3109 | +429              | CTTCACCCACAACGAGACCT  |
| RT_3109+695r    | SRG3109 | +695c             | GAGAAGAACTCCGGGATGTG  |
| RT_5275+215f    | SGR5275 | +215              | AGTACGTCAACGTGCCCTTC  |



|              |         |       |                        |
|--------------|---------|-------|------------------------|
| RT_5275+496r | SGR5275 | +496c | CCTCCTTGAGCAGCTTCTTG   |
| RT_5280+478f | SGR5280 | +478  | TCCCAGATCGGGAACAATA    |
| RT_5280+719r | SGR5280 | +719c | GCCTCGTGCTTCCAGTAGAC   |
| RT_5704+530f | SGR5704 | +530  | CGTTCTACCAGGAGATCGAGTT |
| RT_5704+749r | SGR5704 | +749c | AGCCACTGGTTGAGGTATGC   |
